# Supplementary material for: Supervised extraction of near-complete genomes from metagenomic samples: A new service in PATRIC
Source: PLoS One. 2021 Apr 15;16(4):e0250092. doi: 10.1371/journal.pone.0250092 (PMC8049274; doi:10.1371/journal.pone.0250092)
Supplement: S3 File — These are comparisons between PATRIC and the aligned version of METABAT2. Each page in this spreadsheet, identified by an SRA accession number, summarized the allocations of contigs between METABAT2 and PATRIC. (XLSX) [file pone.0250092.s003.xlsx]

## Sheet: ERR1136887
source_id	target_id	contigs	dna
1.1503e+06	2.29296e+06	74	2426401
1.1503e+06	unbinned	20	362796
1263.79	2.29319e+06	30	2419910
1263.79	unbinned	17	253511
1263.8	2.29316e+06	1	6720
1263.8	411474	110	1271263
1263.8	unbinned	115	738389
1681.93	1.20754e+06	114	1960373
1681.93	1.29892e+06	19	213553
1681.93	2.29291e+06	1	4377
1681.93	unbinned	21	205098
1730.36	1.26289e+06	56	2409377
1730.36	unbinned	8	82872
1730.37	1.6375e+06	29	2057826
1730.37	unbinned	3	20626
2.05362e+06	745368	116	1437321
2.05362e+06	unbinned	119	1000691
2.16182e+06	1.85238e+06	5	80840
2.16182e+06	40520.2	1	10577
2.16182e+06	unbinned	18	208315
239759	2.29291e+06	141	1453585
239759	unbinned	120	872006
259316	1.85238e+06	1	3735
259316	745368	5	73474
259316	853.666	39	458441
259316	unbinned	519	3709329
28026.1	1.20754e+06	4	36402
28026.1	1.29892e+06	1	6904
28026.1	28026.7	72	1661824
28026.1	unbinned	48	389154
286133	1.85238e+06	110	1924960
40518.3	657322	27	1701939
40518.3	unbinned	5	52017
487174	1.26304e+06	2	8971
487174	2.29291e+06	1	5071
487174	821.3	1	4864
487174	unbinned	222	841532
59620.2	1.20754e+06	1	49907
59620.2	1.6375e+06	1	25817
59620.2	2.29319e+06	4	44545
59620.2	40520.2	1	48640
59620.2	411474	4	139660
59620.2	536231	1	18299
59620.2	649756	1	13934
59620.2	657322	5	274122
59620.2	745368	1	41019
59620.2	821.3	1	44170
59620.2	853.666	1	27643
59620.2	unbinned	145	1615932
66666.1	745368	2	21330
66666.1	853.666	5	89756
66666.1	unbinned	69	459724
66666.5	1.85238e+06	4	38934
66666.5	657322	1	25450
66666.5	unbinned	22	240628
66666.5	1.26304e+06	7	31841
66666.5	821.3	2	10373
66666.5	unbinned	305	1288038
66666.5	536231	18	1806235
66666.5	1.20754e+06	2	8007
66666.5	1.26304e+06	1	13962
66666.5	1.85238e+06	1	4218
66666.5	2.29296e+06	2	16217
66666.5	411474	4	35974
66666.5	853.666	2	33814
66666.5	unbinned	157	1217356
66666.5	2.29291e+06	3	93851
66666.5	unbinned	20	238496
66666.5	1.20754e+06	1	9087
66666.5	1.26289e+06	6	179150
66666.5	1.26304e+06	29	277436
66666.5	1.26308e+06	93	2276457
66666.5	1.85238e+06	1	3037
66666.5	2.29296e+06	5	30746
66666.5	2.29316e+06	23	191587
66666.5	371601	21	252991
66666.5	40520.2	5	45092
66666.5	411474	1	11569
66666.5	536231	11	422199
66666.5	649756	41	884780
66666.5	821.3	14	139665
66666.5	unbinned	1619	11246883
66666.6	1.85238e+06	11	141680
66666.6	2.29319e+06	1	10690
66666.6	40520.2	1	7149
66666.6	657322	1	37417
66666.6	745368	2	14154
66666.6	unbinned	113	959060
66666.6	1.20754e+06	7	131854
66666.6	1.29892e+06	81	1469873
66666.6	28026.7	4	85047
66666.6	unbinned	38	296478
66666.6	1.20754e+06	2	5878
66666.6	1.85238e+06	1	4322
66666.6	unbinned	75	262031
66666.6	853.666	2	224912
66666.6	2.29296e+06	1	58383
66666.6	2.29316e+06	125	1357869
66666.6	40520.2	183	1341551
66666.6	536231	16	1418581
66666.6	unbinned	603	3687098
66666.6	649756	116	2138830
66666.6	unbinned	109	1108660
66666.6	unbinned	14	212116
66666.6	1.26308e+06	1	14980
66666.6	2.29296e+06	1	6415
66666.6	2.29319e+06	1	11046
66666.6	411474	1	3865
66666.6	536231	1	9650
66666.6	657322	2	10526
66666.6	unbinned	228	1133464
820.498	1.26304e+06	224	3595862
820.498	1.85238e+06	1	3419
820.498	2.29291e+06	6	70681
820.498	371601	150	4031432
820.498	457393	58	3997967
820.498	821.3	102	3094926
820.498	unbinned	1578	13182088
853.763	745368	1	4495
853.763	853.666	68	1324198
853.763	unbinned	50	418602
unused	1.20754e+06	76	120591
unused	1.26289e+06	12	18858
unused	1.26304e+06	296	414280
unused	1.26308e+06	3	9641
unused	1.29892e+06	23	44250
unused	1.6375e+06	3	3836
unused	1.85238e+06	78	144577
unused	2.29291e+06	30	114257
unused	2.29296e+06	9	20699
unused	2.29316e+06	43	62061
unused	2.29319e+06	3	67621
unused	28026.7	11	18709
unused	371601	37	60614
unused	40520.2	117	174880
unused	411474	23	140990
unused	457393	16	32228
unused	536231	15	30855
unused	649756	48	74058
unused	657322	2	2855
unused	745368	24	52696
unused	821.3	11	16832
unused	853.666	25	44431

## Sheet: ERR1398081
source_id	target_id	contigs	dna
1.19353e+06	1.94559e+06	1	3370
1.19353e+06	2.29201e+06	1	4012
1.19353e+06	unbinned	81	282068
1.26292e+06	1.80776e+06	82	1447388
1.26292e+06	2.02253e+06	1	15731
1.26292e+06	unbinned	49	500973
1304.16	1.20079e+06	147	943174
1304.16	unbinned	102	441117
1354.32	1.20079e+06	6	24367
1354.32	1.28559e+06	1	4106
1354.32	573.251	1	3711
1354.32	unbinned	153	548354
142586	142586	1	15917
142586	39485.1	122	539965
142586	unbinned	150	555346
142586	142586	52	2243858
142586	unbinned	9	179473
1485.4	2.29304e+06	3	36045
1485.4	2.30524e+06	97	2094474
1485.4	unbinned	37	498298
165179	1.20079e+06	3	9767
165179	165179	117	1310610
165179	1.94559e+06	1	12523
165179	2.02253e+06	40	402653
165179	2.29201e+06	2	16090
165179	2.29205e+06	90	2360257
165179	2.29313e+06	250	3405448
165179	39485.1	2	8753
165179	unbinned	582	4053744
1.94559e+06	172733	3	14037
1.94559e+06	1.94559e+06	100	755369
1.94559e+06	2.29232e+06	1	3255
1.94559e+06	unbinned	97	528785
2.29304e+06	2.29304e+06	89	1793331
2.29304e+06	2.30524e+06	2	25157
2.29304e+06	unbinned	47	410845
310297	1.80776e+06	1	8713
310297	2.02253e+06	22	133326
310297	2.29313e+06	12	44597
310297	310298	161	1902964
310297	742823	1	4419
310297	unbinned	733	3672892
360807	142586	5	135754
360807	2.02253e+06	1	2891
360807	2.29201e+06	21	109751
360807	2.29304e+06	7	160560
360807	2.29313e+06	1	7759
360807	2.30524e+06	8	127983
360807	310298	1	13559
360807	360808	161	1102143
360807	39485.1	2	13804
360807	410072	161	1148285
360807	unbinned	1054	5099946
52225.5	52226.9	36	2198082
52225.5	unbinned	8	87599
570.181	573.251	345	3786179
570.181	unbinned	119	701164
59620.2	2.29201e+06	173	1058962
59620.2	2.30524e+06	4	66706
59620.2	39485.1	2	8588
59620.2	410072	1	2859
59620.2	742823	1	7658
59620.2	unbinned	186	940370
66666.5	2.30524e+06	1	3218
66666.5	853.665	7	19868
66666.5	unbinned	109	414084
66666.5	1.26293e+06	14	599394
66666.5	unbinned	1	28850
66666.5	1.26293e+06	5	324289
66666.5	unbinned	3	74328
66666.5	172733	1	5689
66666.5	2.29201e+06	4	17044
66666.5	853.665	3	10247
66666.5	unbinned	92	457165
66666.5	172733	100	608692
66666.5	1.94559e+06	20	132403
66666.5	unbinned	342	1673754
66666.5	626941	122	1048439
66666.5	unbinned	138	699932
66666.5	1.28559e+06	1	3624
66666.5	unbinned	89	310420
66666.5	2.29201e+06	1	3005
66666.5	360808	1	3693
66666.5	742823	1	2741
66666.5	853.665	1	3808
66666.5	unbinned	95	338379
66666.5	2.29201e+06	1	5690
66666.5	626941	1	4304
66666.5	unbinned	55	334388
66666.5	1.26293e+06	18	666579
66666.5	unbinned	3	32972
66666.5	1.20079e+06	1	7422
66666.5	573.251	9	41926
66666.5	unbinned	271	1317877
66666.5	742823	17	262086
66666.5	unbinned	3	11571
66666.5	2.29201e+06	2	11116
66666.5	410072	1	6185
66666.5	853.665	222	2104958
66666.5	unbinned	520	2418731
66666.5	626941	2	14894
66666.5	unbinned	32	214830
66666.5	1.80776e+06	25	209144
66666.5	unbinned	14	87231
74426.2	2.29232e+06	71	312180
74426.2	unbinned	121	459739
838.142	165179	1	7889
838.142	2.02253e+06	89	2999786
838.142	unbinned	1	39605
838.143	1.26293e+06	22	1119022
838.143	unbinned	8	122796
850.176	165179	1	3932
850.176	2.02253e+06	1	2560
850.176	2.29232e+06	1	3394
850.176	626941	1	4054
850.176	unbinned	127	467902
907.162	1.28559e+06	103	1521281
907.162	unbinned	69	490800
unused	1.20079e+06	110	168145
unused	1.26293e+06	4	7509
unused	1.28559e+06	14	25357
unused	142586	11	33435
unused	165179	47	75849
unused	172733	118	178121
unused	1.80776e+06	16	35907
unused	1.94559e+06	50	78311
unused	2.02253e+06	186	339624
unused	2.29201e+06	1105	928503
unused	2.29205e+06	14	84295
unused	2.29232e+06	165	274352
unused	2.29304e+06	16	68290
unused	2.29313e+06	379	475198
unused	2.30524e+06	15	21918
unused	310298	41	78731
unused	360808	81	110011
unused	39485.1	163	213601
unused	410072	61	89001
unused	52226.9	10	73623
unused	573.251	93	151694
unused	626941	50	78262
unused	742823	529	2866586
unused	853.665	135	213908

## Sheet: ERR260232
source_id	target_id	contigs	dna
1263.83	41978.4	20	2026736
1263.83	unbinned	4	36979
1263.84	2.29316e+06	74	1930230
1263.84	unbinned	39	380201
1485.41	1.89821e+06	110	786992
1485.41	unbinned	98	601523
1485.41	1.89821e+06	1	3162
1485.41	2.29316e+06	2	17238
1485.41	unbinned	251	1155684
159273	1.94723e+06	53	2492683
159273	unbinned	37	594926
1.897e+06	2.04904e+06	8	169091
1.897e+06	2.29316e+06	1	2720
1.897e+06	33043.1	1	17009
1.897e+06	unbinned	134	1569394
1.89821e+06	1.89821e+06	2	55927
1.89821e+06	2.29316e+06	1	5455
1.89821e+06	33043.1	1	8778
1.89821e+06	41978.4	1	10191
1.89821e+06	unbinned	203	1552581
2.0268e+06	1.89821e+06	1	8338
2.0268e+06	2.29316e+06	2	29754
2.0268e+06	33043.1	3	60131
2.0268e+06	41978.4	1	16955
2.0268e+06	45851.7	1	30870
2.0268e+06	unbinned	296	2080635
33042.9	33043.1	80	2358482
33042.9	unbinned	28	246909
512312	1.94723e+06	2	8185
512312	unbinned	326	1579259
66666.6	1.89821e+06	2	12822
66666.6	2.29316e+06	1	3588
66666.6	unbinned	198	904932
66666.6	2.29316e+06	1	41184
66666.6	unbinned	89	510814
66666.6	1.2628e+06	6	70225
66666.6	1.89821e+06	4	64762
66666.6	1.94723e+06	4	29551
66666.6	2.04904e+06	48	884280
66666.6	2.29316e+06	5	42476
66666.6	33043.1	14	277228
66666.6	41978.4	3	20890
66666.6	45851.7	15	676045
66666.6	unbinned	3678	20489560
66666.6	1.2628e+06	61	1438183
66666.6	33043.1	2	28801
66666.6	41978.4	1	24268
66666.6	unbinned	193	1135114
66666.6	33043.1	2	26604
66666.6	unbinned	65	957251
66666.6	1.89821e+06	1	7549
66666.6	unbinned	143	810133
66666.6	1.94723e+06	2	16753
66666.6	unbinned	193	913911
66666.6	1.94723e+06	1	3814
66666.6	unbinned	189	740349
66666.6	33043.1	1	6418
66666.6	unbinned	63	339677
66666.6	1.2628e+06	2	8761
66666.6	unbinned	130	629227
66666.6	unbinned	65	234462
66666.6	1.94723e+06	4	251818
66666.6	unbinned	7	97595
66666.6	unbinned	62	215529
830.14	45851.7	12	1414792
830.14	unbinned	1	17110
841.19	2.04904e+06	45	1385118
841.19	2.29316e+06	1	2562
841.19	unbinned	59	359416
unused	1.2628e+06	7	8945
unused	1.89821e+06	58	170669
unused	1.94723e+06	15	34984
unused	2.04904e+06	14	23380
unused	2.29316e+06	9	11096
unused	33043.1	10	14968
unused	41978.4	3	5755
unused	45851.7	6	5713

## Sheet: ERR321564
source_id	target_id	contigs	dna
1.1503e+06	2.29297e+06	91	1230883
1.1503e+06	unbinned	76	465541
1.19353e+06	1.89701e+06	180	963952
1.19353e+06	1.89701e+06	11	108822
1.19353e+06	1.94559e+06	11	150089
1.19353e+06	unbinned	141	910283
1.26282e+06	1.89821e+06	1	6846
1.26282e+06	unbinned	66	317628
1.26293e+06	2.02423e+06	54	1804643
1.26293e+06	unbinned	18	194305
135858	2.04902e+06	80	1407416
135858	unbinned	68	533769
142586	142586	2	9099
142586	1.8982e+06	1	2652
142586	2.29297e+06	1	9431
142586	2.29305e+06	3	14298
142586	853.666	1	3250
142586	unbinned	286	1106759
142586	1.26288e+06	1	22273
142586	142586	116	2353880
142586	unbinned	2	14281
1485.39	1.89701e+06	1	4046
1485.39	unbinned	158	614495
1485.39	2.29305e+06	23	1821090
1485.39	unbinned	1	4555
1485.39	1.26304e+06	1	6100
1485.39	1.2631e+06	6	88970
1485.39	142586	3	21140
1485.39	1.8982e+06	113	3059808
1485.39	1.94559e+06	1	6910
1485.39	2.02253e+06	2	15414
1485.39	2.29297e+06	3	16496
1485.39	2.29305e+06	3	37027
1485.39	418240	98	2294283
1485.39	853.666	1	3467
1485.39	unbinned	1341	8801323
1485.39	142586	4	20890
1485.39	1.8982e+06	2	27626
1485.39	2.29305e+06	13	694779
1485.39	418240	1	11522
1485.39	717959	1	2710
1485.39	unbinned	243	1525482
172733	1.89821e+06	49	509352
172733	unbinned	55	377204
172733	142586	1	19665
172733	1.89701e+06	1	3111
172733	unbinned	272	1218362
1730.31	1.26278e+06	1	4777
1730.31	1.26288e+06	2	31423
1730.31	142586	7	108825
1730.31	1.89701e+06	2	11026
1730.31	1.89703e+06	1	8272
1730.31	1.8982e+06	1	25779
1730.31	1.89821e+06	6	102887
1730.31	1.89821e+06	1	31099
1730.31	2.04902e+06	1	9359
1730.31	2.29297e+06	1	17442
1730.31	717959	1	6575
1730.31	unbinned	153	1171712
1730.32	1.2628e+06	6	29498
1730.32	1.26304e+06	17	121616
1730.32	1.2631e+06	3	30675
1730.32	142586	18	123940
1730.32	159272	36	252687
1730.32	1.89701e+06	1	24078
1730.32	1.8982e+06	2	49773
1730.32	1.89821e+06	12	301454
1730.32	2.02253e+06	36	304280
1730.32	2.04902e+06	1	19520
1730.32	2.29297e+06	5	45379
1730.32	2.29305e+06	7	381471
1730.32	28116.9	49	356612
1730.32	310298	35	297601
1730.32	418240	7	99749
1730.32	457391	37	319890
1730.32	59823.5	21	130334
1730.32	626939	2	21855
1730.32	717959	14	77284
1730.32	745368	1	17350
1730.32	762969	24	174629
1730.32	820.423	3	40728
1730.32	823.294	5	79973
1730.32	853.666	2	21868
1730.32	unbinned	2821	16825945
1730.33	1.26288e+06	57	1868143
1730.33	unbinned	50	617393
1.84187e+06	142586	4	14676
1.84187e+06	1.89701e+06	2	7132
1.84187e+06	2.04902e+06	1	4528
1.84187e+06	unbinned	189	837539
1.89821e+06	1.89821e+06	15	1481799
1.94559e+06	1.26278e+06	2	10192
1.94559e+06	1.26288e+06	1	4347
1.94559e+06	142586	3	11302
1.94559e+06	172733	95	1062909
1.94559e+06	1.89701e+06	15	89140
1.94559e+06	1.89701e+06	1	11707
1.94559e+06	1.89703e+06	3	10637
1.94559e+06	1.89821e+06	57	439751
1.94559e+06	1.94559e+06	102	1420242
1.94559e+06	2.05349e+06	1	38154
1.94559e+06	2.29297e+06	1	10871
1.94559e+06	745368	2	9201
1.94559e+06	unbinned	844	4079878
1.94559e+06	1.26278e+06	1	3325
1.94559e+06	1.2631e+06	1	6084
1.94559e+06	142586	6	53592
1.94559e+06	1.89701e+06	3	14904
1.94559e+06	1.89821e+06	2	12771
1.94559e+06	1.89821e+06	1	4795
1.94559e+06	2.05349e+06	1	38041
1.94559e+06	unbinned	224	1574648
1.94559e+06	1.89701e+06	1	6495
1.94559e+06	1.94559e+06	39	1309056
1.94559e+06	unbinned	24	260983
1.94628e+06	1.26278e+06	5	25390
1.94628e+06	unbinned	116	429957
1.96566e+06	1.89703e+06	39	1778564
1.96566e+06	unbinned	18	176737
2.0268e+06	1.26278e+06	1	5398
2.0268e+06	unbinned	80	280489
2.0268e+06	142586	1	4946
2.0268e+06	717959	1	5357
2.0268e+06	762969	1	3677
2.0268e+06	unbinned	192	795502
2.04494e+06	1.26278e+06	52	1606850
2.04494e+06	unbinned	29	363625
2.05362e+06	745368	106	1090827
2.05362e+06	853.666	1	3942
2.05362e+06	unbinned	177	1028529
216851	1.89821e+06	106	1997953
216851	unbinned	86	827489
2.36479e+06	1.26278e+06	1	8377
2.36479e+06	1.26288e+06	1	5260
2.36479e+06	142586	7	42909
2.36479e+06	1.89701e+06	3	27936
2.36479e+06	1.89703e+06	2	26282
2.36479e+06	1.89821e+06	1	5003
2.36479e+06	1.94559e+06	2	113015
2.36479e+06	59823.5	1	5361
2.36479e+06	unbinned	161	1101369
239759	1.11806e+06	105	1936704
239759	1.87244e+06	105	1556314
239759	214856	150	1309127
239759	310298	1	11491
239759	445970	18	825579
239759	717959	338	2371721
239759	742821	1	7180
239759	762969	1	4593
239759	820.423	1	8851
239759	unbinned	464	3209332
270497	142586	2	51242
270497	1.89701e+06	1	2940
270497	1.89821e+06	1	20535
270497	2.05349e+06	1	16464
270497	unbinned	115	1771424
28118.2	1.26304e+06	5	31424
28118.2	142586	1	8020
28118.2	159272	2	8566
28118.2	1.89703e+06	1	3153
28118.2	28116.9	2	12851
28118.2	310298	5	26963
28118.2	59823.5	1	3683
28118.2	717959	3	19452
28118.2	762969	7	37144
28118.2	820.423	1	13298
28118.2	unbinned	388	1822720
310297	762969	44	3062342
310297	unbinned	6	26348
387090	1.26304e+06	51	1497199
387090	159272	29	352740
387090	1.67661e+06	2	51685
387090	1.87244e+06	1	5943
387090	2.02253e+06	29	608521
387090	2.02423e+06	4	111556
387090	28116.9	119	804655
387090	310298	91	3153290
387090	457391	119	2655250
387090	59823.5	7	33993
387090	717959	10	98360
387090	762969	21	624228
387090	820.423	129	3085021
387090	823.294	4	16187
387090	unbinned	1253	8600915
40545.1	742821	65	2236031
40545.1	unbinned	31	417479
487174	1.11806e+06	1	14321
487174	1.26304e+06	6	61273
487174	159272	2	19081
487174	1.87244e+06	1	20419
487174	2.02253e+06	1	2875
487174	28116.9	1	9732
487174	310298	7	95058
487174	59823.5	2	10939
487174	717959	7	49041
487174	762969	9	66286
487174	820.423	1	12858
487174	823.294	3	26547
487174	unbinned	320	2319177
52225.4	1.26278e+06	1	15238
52225.4	1.2628e+06	1	3498
52225.4	1.26288e+06	1	14515
52225.4	142586	2	17047
52225.4	1.8982e+06	1	48788
52225.4	1.89821e+06	1	24847
52225.4	2.04902e+06	1	31212
52225.4	59823.5	1	4182
52225.4	626939	35	963276
52225.4	853.666	1	16321
52225.4	unbinned	96	994631
59823.7	159272	2	93042
59823.7	59823.5	58	2377236
59823.7	unbinned	5	92988
626940	626939	48	2026803
626940	unbinned	11	131963
66666.5	159272	1	29959
66666.5	1.67661e+06	6	374747
66666.5	2.02253e+06	1	9566
66666.5	310298	1	3672
66666.5	762969	3	24352
66666.5	unbinned	4	114981
66666.5	1.26278e+06	2	26058
66666.5	1.26288e+06	1	20124
66666.5	142586	5	58299
66666.5	172733	1	9361
66666.5	1.89701e+06	23	115067
66666.5	1.89701e+06	2	27729
66666.5	1.94559e+06	3	34005
66666.5	2.02253e+06	1	2852
66666.5	2.29297e+06	2	11347
66666.5	59823.5	1	3422
66666.5	745368	2	17048
66666.5	853.666	6	29641
66666.5	unbinned	660	4616630
66666.5	142586	1	7370
66666.5	445970	3	61019
66666.5	717959	9	64143
66666.5	unbinned	16	204177
66666.5	1.89701e+06	8	29404
66666.5	1.89701e+06	85	689728
66666.5	1.94559e+06	1	3655
66666.5	unbinned	143	716812
66666.5	1.89701e+06	1	5195
66666.5	745368	1	16203
66666.5	unbinned	26	212174
66666.5	1.2628e+06	82	447841
66666.5	1.26304e+06	1	4290
66666.5	2.05349e+06	38	1266153
66666.5	unbinned	170	1040845
66666.5	2.02253e+06	1	12761
66666.5	310298	2	13826
66666.5	717959	1	12900
66666.5	unbinned	10	184269
66666.5	1.11806e+06	1	50173
66666.5	445970	23	1265276
66666.5	717959	19	131247
66666.5	unbinned	23	173818
66666.5	1.26304e+06	40	1476869
66666.5	310298	1	4309
66666.5	unbinned	7	32957
66666.5	1.89701e+06	2	8608
66666.5	1.89701e+06	1	3838
66666.5	unbinned	88	287947
66666.5	142586	1	2502
66666.5	159272	1	4097
66666.5	1.89701e+06	3	10548
66666.5	1.89821e+06	5	94091
66666.5	2.02253e+06	1	2919
66666.5	418240	1	3055
66666.5	762969	1	6608
66666.5	unbinned	281	1314530
66666.5	1.26288e+06	1	3335
66666.5	142586	2	9896
66666.5	unbinned	14	197369
66666.5	142586	2	11020
66666.5	1.89701e+06	1	4343
66666.5	1.89703e+06	1	2690
66666.5	1.8982e+06	1	5838
66666.5	1.89821e+06	1	7221
66666.5	2.29297e+06	11	88466
66666.5	745368	2	7653
66666.5	unbinned	261	1132034
66666.5	142586	7	39636
66666.5	1.89701e+06	1	6432
66666.5	unbinned	189	712585
66666.5	1.11806e+06	1	203119
66666.5	unbinned	10	172156
66666.5	142586	1	2577
66666.5	1.8982e+06	87	676877
66666.5	2.29297e+06	1	3529
66666.5	unbinned	114	587283
66666.5	142586	5	101207
66666.5	1.89821e+06	1	10179
66666.5	1.94559e+06	1	6266
66666.5	626939	1	3001
66666.5	unbinned	148	576046
66666.5	142586	2	5671
66666.5	1.89701e+06	15	111003
66666.5	1.89701e+06	2	47987
66666.5	1.89703e+06	1	2947
66666.5	1.94559e+06	2	25298
66666.5	310298	1	18171
66666.5	853.666	2	7252
66666.5	unbinned	265	1847540
66666.5	159272	4	92648
66666.5	1.67661e+06	2	31076
66666.5	2.02253e+06	45	1398407
66666.5	310298	2	34790
66666.5	59823.5	1	13370
66666.5	762969	1	15215
66666.5	unbinned	5	51100
66666.5	1.2631e+06	2	12429
66666.5	142586	1	5921
66666.5	2.05349e+06	1	3749
66666.5	unbinned	212	855534
66666.5	1.26288e+06	1	169425
66666.5	unbinned	5	129415
66666.5	159272	4	103623
66666.5	1.67661e+06	1	4147
66666.5	2.02253e+06	32	816654
66666.5	2.02423e+06	1	8616
66666.5	59823.5	1	46365
66666.5	unbinned	2	40079
66666.5	1.89821e+06	44	1366642
66666.5	1.89821e+06	1	5507
66666.5	unbinned	37	286604
823.342	823.294	79	4265713
823.342	unbinned	22	317841
838.14	1.26304e+06	1	25927
838.14	159272	4	83098
838.14	1.67661e+06	60	1698623
838.14	2.02253e+06	6	94804
838.14	310298	1	33638
838.14	445970	1	37842
838.14	59823.5	4	36142
838.14	762969	4	90531
838.14	unbinned	68	594624
838.141	159272	145	1671968
838.141	1.67661e+06	1	20780
838.141	2.02253e+06	13	170991
838.141	2.02423e+06	12	561618
838.141	59823.5	5	81053
838.141	unbinned	30	278513
841.15	1.2631e+06	76	3011815
841.15	1.8982e+06	7	163253
841.15	2.29297e+06	32	381368
841.15	418240	1	6138
841.15	unbinned	421	3027767
853.762	1.89701e+06	1	8286
853.762	1.94559e+06	1	3049
853.762	745368	1	10297
853.762	853.666	231	1573876
853.762	unbinned	562	2639701
872.38	1.89701e+06	1	4639
872.38	2.05349e+06	1	27860
872.38	310298	1	9247
872.38	445970	1	13018
872.38	626939	4	140410
872.38	742821	4	111607
872.38	745368	1	7223
872.38	unbinned	231	1863385
unused	1.11806e+06	8	14203
unused	1.26278e+06	6	5351
unused	1.2628e+06	43	57185
unused	1.26288e+06	2	44525
unused	1.26304e+06	96	131511
unused	1.2631e+06	6	6069
unused	142586	247	353871
unused	159272	277	474300
unused	1.67661e+06	4	22753
unused	172733	19	31761
unused	1.87244e+06	17	40494
unused	1.89701e+06	561	748935
unused	1.89701e+06	46	86953
unused	1.89703e+06	18	30060
unused	1.8982e+06	71	122694
unused	1.89821e+06	1	900
unused	1.89821e+06	34	111585
unused	1.94559e+06	16	46041
unused	2.02253e+06	147	328208
unused	2.02423e+06	7	45148
unused	2.04902e+06	3	11766
unused	2.05349e+06	1	15831
unused	214856	103	144584
unused	2.29297e+06	26	41296
unused	2.29305e+06	6	9846
unused	28116.9	168	254297
unused	310298	192	359251
unused	418240	18	32431
unused	445970	4	68620
unused	457391	14	38723
unused	59823.5	59	105999
unused	626939	1	12566
unused	717959	589	896863
unused	742821	6	32775
unused	745368	63	104125
unused	762969	95	153851
unused	820.423	9	34827
unused	823.294	8	16268
unused	853.666	166	263127

## Sheet: ERR525795
source_id	target_id	contigs	dna
100884	1.40843e+06	1	5438
100884	165186	1	18805
100884	1.89821e+06	2	8264
100884	1.95309e+06	2	19147
100884	214856	6	36760
100884	39488.1	1	3716
100884	818.789	1	10074
100884	821.3	1	4533
100884	853.666	1	11120
100884	unbinned	293	1642665
1485.4	165186	4	128239
1485.4	1.89821e+06	57	963184
1485.4	214856	1	26383
1485.4	39488.1	1	8798
1485.4	592028	1	22241
1485.4	unbinned	53	610191
165186	165186	84	1156926
165186	unbinned	107	915056
1680.2	1680.17	123	621372
1680.2	1.95309e+06	1	2734
1680.2	unbinned	479	2095467
1730.41	1.89821e+06	2	8003
1730.41	2.04904e+06	3	13216
1730.41	39488.1	1	3566
1730.41	unbinned	217	836824
2093.13	1.40843e+06	1	13732
2093.13	1.89821e+06	4	32688
2093.13	2.29288e+06	3	16180
2093.13	39488.1	1	14021
2093.13	unbinned	288	1876291
239759	1.87244e+06	159	1821618
239759	214856	265	1386979
239759	821.3	1	10833
239759	unbinned	27	107804
35833.4	1.40843e+06	224	1004824
35833.4	unbinned	9	32849
577310	1.95309e+06	246	2213307
577310	unbinned	6	63538
66666.6	1.40843e+06	3	25659
66666.6	165186	4	113881
66666.6	1.89821e+06	1	6218
66666.6	214856	1	6133
66666.6	410072	1	3141
66666.6	818.789	1	6022
66666.6	820.424	3	21315
66666.6	853.666	4	45840
66666.6	unbinned	288	1695774
66666.6	165186	6	241034
66666.6	unbinned	17	310929
66666.6	1.40843e+06	3	10294
66666.6	165186	1	5837
66666.6	1.89821e+06	1	3636
66666.6	1.95309e+06	53	225772
66666.6	unbinned	95	362695
66666.6	1.40843e+06	2	7449
66666.6	165186	1	6925
66666.6	1.89821e+06	1	6434
66666.6	1.95309e+06	1	5416
66666.6	818.789	1	2854
66666.6	unbinned	193	1039747
66666.6	1.40843e+06	1	5113
66666.6	1.89821e+06	2	9717
66666.6	818.789	1	5817
66666.6	unbinned	134	562772
66666.6	1.40843e+06	3	19641
66666.6	1.87244e+06	4	28928
66666.6	1.89821e+06	3	53631
66666.6	2.04904e+06	14	455502
66666.6	214856	9	66779
66666.6	2.29288e+06	142	1688550
66666.6	28116.9	14	375997
66666.6	39488.1	117	1966403
66666.6	410072	11	288269
66666.6	592028	5	383914
66666.6	818.789	59	829417
66666.6	820.424	7	81614
66666.6	821.3	29	480807
66666.6	823.294	3	48591
66666.6	unbinned	1390	8528717
66666.6	592028	56	957575
66666.6	unbinned	28	325548
66666.6	1.87244e+06	2	71012
66666.6	214856	1	16903
66666.6	818.789	3	23441
66666.6	821.3	6	58852
66666.6	unbinned	7	84127
818.135	1.40843e+06	4	37726
818.135	1.87244e+06	2	74516
818.135	214856	1	22033
818.135	28116.9	96	4162103
818.135	592028	1	7172
818.135	818.789	291	5148659
818.135	820.424	31	1055188
818.135	821.3	78	4474277
818.135	823.294	3	153896
818.135	unbinned	167	1847100
823.342	823.294	72	3916788
823.342	unbinned	29	710444
841.18	1.40843e+06	3	31566
841.18	165186	2	16165
841.18	1.89821e+06	12	101923
841.18	1.95309e+06	1	3048
841.18	2.04904e+06	49	2215885
841.18	2.29288e+06	3	16204
841.18	39488.1	4	51236
841.18	410072	81	2253699
841.18	unbinned	1007	6407439
853.763	853.666	109	699457
853.763	unbinned	256	1154214
unused	1.40843e+06	1337	1465828
unused	165186	19	45003
unused	1680.17	210	274650
unused	1.87244e+06	147	355040
unused	1.89821e+06	115	140596
unused	1.95309e+06	330	562717
unused	2.04904e+06	14	32427
unused	214856	1044	1215683
unused	2.29288e+06	51	77438
unused	28116.9	7	110864
unused	39488.1	10	18228
unused	410072	11	66998
unused	592028	8	16421
unused	818.789	320	504288
unused	820.424	182	3275771
unused	821.3	122	283278
unused	823.294	1	629
unused	853.666	117	160041

## Sheet: ERR526044
source_id	target_id	contigs	dna
142586	2.08658e+06	1	6896
142586	2.29223e+06	1	6425
142586	418240	2	9601
142586	876091	3	16754
142586	unbinned	373	2062968
1678.5	2.29223e+06	1	7917
1678.5	28026.7	149	1058807
1678.5	unbinned	181	943693
1681.94	2.29223e+06	2	7031
1681.94	28026.7	10	48266
1681.94	unbinned	244	1087396
207244	1.26304e+06	1	3621
207244	2.08658e+06	2	17984
207244	2.29223e+06	5	67708
207244	418240	5	132512
207244	876091	3	42718
207244	997873	1	9818
207244	unbinned	143	1607877
2.08658e+06	2.08658e+06	62	1674094
2.08658e+06	unbinned	22	208165
239759	1.26304e+06	61	2664166
239759	997873	1	5376
239759	unbinned	19	427626
28116.1	2.08658e+06	16	503204
28116.1	2.29223e+06	2	5326
28116.1	2.29295e+06	34	4353407
28116.1	28111.3	55	3413387
28116.1	28116.9	108	5705374
28116.1	418240	11	383852
28116.1	821.3	126	3006809
28116.1	876091	1	6176
28116.1	997873	492	5282056
28116.1	unbinned	1222	11077152
40518.3	2.08658e+06	5	17501
40518.3	unbinned	63	221927
66666.6	unbinned	100	332725
66666.6	1.26304e+06	3	53113
66666.6	unbinned	14	213229
66666.6	876091	1	4160
66666.6	unbinned	71	609286
66666.6	876091	5	213145
66666.6	unbinned	35	482083
66666.6	2.08658e+06	2	28698
66666.6	2.29223e+06	2	8078
66666.6	418240	87	2493721
66666.6	876091	2	22229
66666.6	unbinned	533	3995430
66666.6	2.29295e+06	1	45076
66666.6	997873	3	80364
66666.6	unbinned	10	188525
74426.2	2.29223e+06	91	1999568
74426.2	unbinned	2	8051
876091	2.29223e+06	3	10660
876091	876091	146	1175733
876091	unbinned	373	2075862
unused	1.26304e+06	4	7845
unused	2.08658e+06	8	14109
unused	2.29223e+06	121	223701
unused	2.29295e+06	1	12694
unused	28026.7	85	148395
unused	28111.3	3	4859
unused	28116.9	3	22796
unused	418240	5	19406
unused	821.3	9	12920
unused	876091	30	58125
unused	997873	290	534589

## Sheet: ERR527062
source_id	target_id	contigs	dna
1263.81	2.29317e+06	41	2561852
1263.81	unbinned	15	184828
142586	39485.1	24	2754037
142586	142586	144	2385307
142586	1.89702e+06	1	6417
142586	1.8982e+06	1	20031
142586	39485.1	1	56909
142586	unbinned	23	345071
1485.4	1.8982e+06	18	2587709
1485.4	unbinned	3	8320
1730.38	2.29235e+06	53	1677344
1730.38	unbinned	17	268928
1730.39	142586	1	32605
1730.39	1.897e+06	25	2125959
1730.39	unbinned	3	90018
1.89702e+06	142586	2	12692
1.89702e+06	1.89702e+06	57	2306470
1.89702e+06	unbinned	33	597221
2.29302e+06	142586	36	441105
2.29302e+06	1.897e+06	3	27149
2.29302e+06	1.89702e+06	2	23597
2.29302e+06	2.29208e+06	1	5219
2.29302e+06	2.29317e+06	1	30993
2.29302e+06	39485.1	3	34362
2.29302e+06	853.667	1	11664
2.29302e+06	unbinned	266	1779651
239759	445970	41	2095669
239759	unbinned	6	18572
301302	142586	14	153016
301302	1.897e+06	1	29045
301302	1.89702e+06	11	497917
301302	1.8982e+06	1	35221
301302	853.667	2	25055
301302	unbinned	157	1795167
40544.8	2.29208e+06	27	2301245
66666.6	291645	17	533499
66666.6	457393	1	2640
66666.6	821.3	1	47314
66666.6	997888	24	1876438
66666.6	unbinned	48	1530955
66666.6	142586	10	63533
66666.6	1.8982e+06	1	5833
66666.6	2.29208e+06	2	15022
66666.6	2.29235e+06	2	11816
66666.6	2.29317e+06	3	24817
66666.6	39485.1	1	7690
66666.6	445970	2	11661
66666.6	853.667	1	10495
66666.6	unbinned	330	2005342
66666.6	2.29208e+06	7	33088
66666.6	445970	6	39768
66666.6	unbinned	267	1145260
66666.6	2.29235e+06	1	8209
66666.6	853.667	1	20470
66666.6	unbinned	113	746268
66666.6	853.667	4	27157
66666.6	unbinned	86	504717
66666.6	142586	10	36623
66666.6	1.89702e+06	2	8380
66666.6	unbinned	165	644447
66666.6	142586	2	8332
66666.6	853.667	6	36708
66666.6	unbinned	247	980509
820.498	142586	63	512305
820.498	1.897e+06	6	234247
820.498	1.89702e+06	8	345831
820.498	1.8982e+06	3	463402
820.498	2.29208e+06	1	5532
820.498	2.29235e+06	2	132084
820.498	291645	149	2889819
820.498	310298	70	3407372
820.498	39485.1	4	28907
820.498	445970	37	419772
820.498	457393	125	3132108
820.498	821.3	64	4126740
820.498	853.667	2	56302
820.498	997888	111	2975547
820.498	unbinned	3420	26814120
853.763	853.667	214	2927817
853.763	unbinned	660	3581089
unused	142586	510	590156
unused	1.897e+06	1	1058
unused	1.89702e+06	4	19330
unused	1.8982e+06	3	3509
unused	2.29208e+06	208	193083
unused	2.29235e+06	9	39311
unused	2.29317e+06	3	2420
unused	291645	24	43129
unused	310298	5	6025
unused	39485.1	6	9705
unused	445970	750	774419
unused	457393	32	74145
unused	821.3	1	1047
unused	853.667	66	113442
unused	997888	31	40848

## Sheet: ERR528311
source_id	target_id	contigs	dna
1263.9	1.89821e+06	38	2180545
1485.41	165179	4	52285
1485.41	1.89821e+06	11	89607
1485.41	2.04904e+06	1	27253
1485.41	2.08658e+06	35	745655
1485.41	28052.1	5	123625
1485.41	28116.9	23	208871
1485.41	310298	8	134703
1485.41	360808	26	576788
1485.41	39485.1	12	104657
1485.41	445970	1	8146
1485.41	457393	40	484701
1485.41	46506.1	14	111526
1485.41	718252	1	5767
1485.41	821.3	73	699944
1485.41	unbinned	1295	8080488
2.08658e+06	2.08658e+06	53	1478792
2.08658e+06	unbinned	1	2513
239759	445970	36	2103597
239759	unbinned	7	66843
310297	28116.9	170	2821432
310297	310298	146	2046539
310297	457393	154	4714062
310297	46506.1	50	3161615
310297	821.3	146	4509875
310297	unbinned	671	5742104
544644	28116.9	1	15157
544644	445970	4	23190
544644	457393	14	105522
544644	46506.1	10	50234
544644	821.3	24	159674
544644	unbinned	409	2306303
66666.7	718252	4	66758
66666.7	unbinned	57	388694
66666.7	1.89821e+06	1	5722
66666.7	2.08658e+06	1	5344
66666.7	718252	19	167956
66666.7	unbinned	265	1495390
66666.7	821.3	10	90028
66666.7	unbinned	11	151763
66666.7	28052.1	72	2042598
66666.7	39485.1	124	1131611
66666.7	unbinned	232	1495921
66666.7	1.89821e+06	8	43499
66666.7	2.04904e+06	7	46126
66666.7	2.08658e+06	13	71905
66666.7	28052.1	4	13985
66666.7	360808	5	19542
66666.7	46506.1	2	12558
66666.7	718252	1	5855
66666.7	unbinned	481	2270968
66666.7	457393	4	12793
66666.7	46506.1	3	10376
66666.7	821.3	2	5201
66666.7	unbinned	69	237021
838.144	165179	126	2443663
838.144	1.89821e+06	1	3850
838.144	457393	3	22071
838.144	46506.1	5	31849
838.144	821.3	6	61753
838.144	unbinned	307	2310762
841.2	2.04904e+06	38	2605790
841.2	360808	91	1491072
841.2	unbinned	119	1422124
853.763	718252	103	1338445
853.763	unbinned	84	588657
unused	165179	32	71889
unused	1.89821e+06	75	141372
unused	2.04904e+06	8	83236
unused	2.08658e+06	174	280375
unused	28052.1	7	13638
unused	28116.9	77	117961
unused	310298	32	79867
unused	360808	17	30549
unused	39485.1	56	108625
unused	445970	17	123674
unused	457393	305	364010
unused	46506.1	114	129146
unused	718252	44	84030
unused	821.3	486	640404

## Sheet: ERR911992
source_id	target_id	contigs	dna
116085	1.26307e+06	2	13618
116085	165186	1	19738
116085	1680.17	1	13477
116085	1.89821e+06	1	21074
116085	649756	2	12036
116085	88431.7	4	59904
116085	unbinned	151	1260708
1.26288e+06	1.26288e+06	17	1770593
1263.75	657322	19	1799623
1263.75	unbinned	4	68362
1263.76	1.26308e+06	1	19831
1263.76	172733	8	61979
1263.76	1.89821e+06	3	37239
1263.76	239935	1	2675
1263.76	29363.5	1	8847
1263.76	657322	2	54655
1263.76	820.424	1	5533
1263.76	unbinned	241	1797837
1485.39	1.26307e+06	3	70184
1485.39	1.26308e+06	1	57653
1485.39	172733	2	17642
1485.39	1.89821e+06	1	103486
1485.39	2.29297e+06	1	24574
1485.39	649756	1	5751
1485.39	88431.7	3	66921
1485.39	unbinned	94	1501679
1485.39	1.89821e+06	45	1719875
1485.39	unbinned	40	565291
1.63751e+06	1.89821e+06	17	1745293
1.63751e+06	unbinned	1	4201
1.63751e+06	1.63751e+06	20	3053141
1.63751e+06	unbinned	5	95956
165185	165185	20	1800276
165185	unbinned	3	67207
1678.5	1.29892e+06	52	2266812
1678.5	1680.17	5	69303
1678.5	742723	1	7255
1678.5	unbinned	18	166890
1680.2	1.29892e+06	1	8144
1680.2	1680.17	67	1991854
1680.2	unbinned	9	51940
172733	172733	1	9276
172733	1.89821e+06	2	41481
172733	1.89821e+06	7	468851
172733	1.94559e+06	5	85222
172733	214856	1	3045
172733	592028	1	4573
172733	742723	2	46076
172733	unbinned	263	2145208
1.897e+06	39491.2	126	1003082
1.897e+06	unbinned	123	706455
1.89821e+06	1.89821e+06	11	1976921
1.89821e+06	unbinned	1	7043
1.89821e+06	1.89821e+06	90	1611193
1.89821e+06	742723	1	3309
1.89821e+06	unbinned	106	981900
1.94559e+06	172733	3	18155
1.94559e+06	1.89821e+06	1	12721
1.94559e+06	1.89821e+06	7	291703
1.94559e+06	1.94559e+06	12	172259
1.94559e+06	742723	2	24114
1.94559e+06	88431.7	1	2829
1.94559e+06	unbinned	189	1666374
1.94647e+06	2.29297e+06	38	2669257
1.94647e+06	unbinned	9	100574
2.05362e+06	1.89821e+06	10	167814
2.05362e+06	1.94559e+06	1	3484
2.05362e+06	742723	1	6378
2.05362e+06	unbinned	259	2000534
207244	649756	35	2186821
207244	unbinned	2	25458
216851	1.89821e+06	61	2519032
216851	unbinned	32	390827
2.2922e+06	172733	1	235008
2.2922e+06	1.89821e+06	2	648890
2.2922e+06	657322	1	197573
2.2922e+06	unbinned	7	1101892
2.29301e+06	1.26308e+06	2	12869
2.29301e+06	165186	2	6559
2.29301e+06	172733	1	4630
2.29301e+06	2.29297e+06	1	2644
2.29301e+06	2.29319e+06	2	7497
2.29301e+06	39491.2	1	3288
2.29301e+06	592028	2	9851
2.29301e+06	649756	2	15913
2.29301e+06	unbinned	345	2063662
239759	1.21181e+06	5	99749
239759	214856	178	3642682
239759	unbinned	250	1637351
239759	1.21181e+06	19	2473988
239759	unbinned	1	2913
239935	239935	25	2770018
301302	1.26307e+06	1	59343
301302	165186	2	13418
301302	2.29297e+06	1	5769
301302	39491.2	1	8227
301302	742723	2	9625
301302	unbinned	294	1356437
459786	1.94559e+06	71	1697999
459786	unbinned	91	636704
47678.1	1.21181e+06	30	150737
47678.1	1.63751e+06	2	9065
47678.1	1680.17	1	2677
47678.1	214856	2	20363
47678.1	239935	3	19035
47678.1	47678.6	127	2161237
47678.1	820.424	70	4097704
47678.1	unbinned	1637	10230917
66666.5	165185	1	6910
66666.5	172733	1	4371
66666.5	1.89821e+06	1	66742
66666.5	592028	1	9144
66666.5	unbinned	56	436786
66666.5	1.21181e+06	2	20004
66666.5	165185	1	5192
66666.5	165186	1	5692
66666.5	1680.17	1	8071
66666.5	172733	1	9291
66666.5	1.94559e+06	1	3095
66666.5	2.29319e+06	1	30761
66666.5	29363.5	69	1765541
66666.5	592028	3	9074
66666.5	649756	1	15689
66666.5	742723	2	8596
66666.5	unbinned	360	2241266
66666.5	592028	17	1017408
66666.5	1.89821e+06	3	11576
66666.5	2.29297e+06	1	2940
66666.5	unbinned	158	611789
66666.5	1.94559e+06	1	14030
66666.5	39491.2	1	3319
66666.5	592028	1	26857
66666.5	unbinned	64	731853
66666.5	1.89821e+06	1	40107
66666.5	2.29297e+06	2	41725
66666.5	unbinned	111	884991
66666.5	1.22632e+06	55	2769999
66666.5	1.26307e+06	40	2480535
66666.5	1.26308e+06	8	138847
66666.5	165185	4	178781
66666.5	165186	251	3496536
66666.5	1680.17	1	11334
66666.5	172733	1	20411
66666.5	2.29297e+06	8	248140
66666.5	2.29319e+06	127	2232904
66666.5	239935	2	36703
66666.5	29363.5	1	4000
66666.5	39491.2	18	203550
66666.5	592028	5	710322
66666.5	649756	11	481782
66666.5	742723	1	4282
66666.5	88431.7	86	2186323
66666.5	unbinned	1995	14235433
66666.5	1.21181e+06	6	29227
66666.5	1.63751e+06	3	23289
66666.5	47678.6	1	4008
66666.5	unbinned	388	1740745
66666.5	1.26307e+06	3	11444
66666.5	2.29297e+06	1	5525
66666.5	29363.5	1	3657
66666.5	742723	1	2786
66666.5	88431.7	1	4674
66666.5	unbinned	197	797146
66666.5	1680.17	1	4524
66666.5	172733	1	4540
66666.5	unbinned	174	702208
66666.5	1.89821e+06	11	1261017
66666.5	unbinned	1	27534
66666.5	unbinned	6	213917
66666.5	1.94559e+06	3	101602
66666.5	29363.5	1	3561
66666.5	unbinned	73	569617
74426.2	742723	36	2019298
821.394	1.21181e+06	18	226230
821.394	1.26307e+06	1	117286
821.394	1.26308e+06	74	2578955
821.394	1.63751e+06	1	15747
821.394	1680.17	2	12729
821.394	172733	6	20399
821.394	1.89821e+06	3	19602
821.394	2.29319e+06	5	68034
821.394	239935	8	45167
821.394	39491.2	4	50650
821.394	47678.6	41	830942
821.394	592028	4	32897
821.394	649756	1	31499
821.394	657322	2	129794
821.394	742723	2	8538
821.394	820.424	4	46656
821.394	88431.7	1	43122
821.394	unbinned	2122	13781708
unused	1.21181e+06	79	183701
unused	1.22632e+06	9	24394
unused	1.26288e+06	6	34768
unused	1.26307e+06	6	8718
unused	1.26308e+06	2	3250
unused	1.29892e+06	8	17569
unused	1.63751e+06	4	8001
unused	165185	159	174801
unused	165186	40	123942
unused	1680.17	64	159925
unused	172733	72	79184
unused	1.89821e+06	10	33091
unused	1.89821e+06	3	5186
unused	1.94559e+06	82	127814
unused	214856	51	145875
unused	2.29297e+06	6	9161
unused	2.29319e+06	19	24571
unused	239935	63	89849
unused	29363.5	6	8876
unused	39491.2	61	103880
unused	47678.6	49	93269
unused	592028	33	46310
unused	649756	2	3094
unused	657322	3	38276
unused	742723	90	170690
unused	820.424	21	53471
unused	88431.7	15	20457

## Sheet: ERR912091
source_id	target_id	contigs	dna
100884	2.10969e+06	55	2101268
100884	unbinned	19	233998
114712	1.11806e+06	4	59799
114712	1.16072e+06	1	72093
114712	1.89698e+06	3	173889
114712	239935	1	54456
114712	39488.1	1	23122
114712	997878	1	14625
114712	unbinned	76	1386224
1.26278e+06	1.26278e+06	21	1885662
1.26278e+06	unbinned	4	79339
1.26278e+06	1.16072e+06	1	5806
1.26278e+06	1.89821e+06	1	8464
1.26278e+06	626929	1	4970
1.26278e+06	unbinned	197	1100278
1263.85	1.16072e+06	37	2154053
1263.85	unbinned	17	213093
1308.11	1304.96	138	817380
1308.11	1308.91	180	1112603
1308.11	unbinned	100	508740
142586	1.16072e+06	1	8628
142586	1304.96	1	13688
142586	142586	2	9162
142586	1506.36	1	4041
142586	1.94651e+06	1	15088
142586	2.10969e+06	1	2969
142586	33043.1	4	25018
142586	39488.1	3	18089
142586	unbinned	285	1844316
142586	142586	41	2379290
142586	unbinned	4	68769
1485.41	1.16072e+06	3	46919
1485.41	1.26278e+06	1	38416
1485.41	1.26288e+06	9	280607
1485.41	1506.36	1	23278
1485.41	1.89701e+06	1	20777
1485.41	1.89821e+06	1	15496
1485.41	1.89821e+06	3	94358
1485.41	1.94651e+06	1	3457
1485.41	2.10969e+06	1	77640
1485.41	unbinned	131	1453660
1.55002e+06	1.16072e+06	2	10945
1.55002e+06	1.89701e+06	1	12557
1.55002e+06	1.94651e+06	3	38858
1.55002e+06	2.10969e+06	1	3648
1.55002e+06	745368	2	25218
1.55002e+06	unbinned	349	2460640
1678.5	1.16072e+06	1	39393
1678.5	1.89821e+06	1	5874
1678.5	2.10969e+06	1	21969
1678.5	74426.1	2	18342
1678.5	745368	1	13961
1678.5	unbinned	213	1786768
1730.43	1.26288e+06	33	1634440
1730.43	1.89821e+06	1	430427
1730.43	unbinned	32	244925
1730.44	1.89821e+06	8	1441243
1730.44	unbinned	1	24641
1.8982e+06	1.8982e+06	21	1758280
1.89821e+06	1.94651e+06	116	1120854
1.89821e+06	745368	3	33755
1.89821e+06	unbinned	190	1206248
1.94559e+06	1.16072e+06	1	9492
1.94559e+06	1.89701e+06	4	49897
1.94559e+06	1.89821e+06	5	119240
1.94559e+06	1.95297e+06	1	4180
1.94559e+06	745368	1	3705
1.94559e+06	unbinned	306	1540476
1.94559e+06	1.89701e+06	11	537811
1.94559e+06	1.89821e+06	1	16044
1.94559e+06	1.95297e+06	36	1475265
1.94559e+06	unbinned	81	460438
1.94642e+06	1.94642e+06	97	1446044
1.94642e+06	unbinned	103	756181
1.96556e+06	1.89821e+06	19	1769851
1.96556e+06	unbinned	5	51468
2.02139e+06	1.11806e+06	4	58050
2.02139e+06	1.21181e+06	2	30478
2.02139e+06	626929	2	18709
2.02139e+06	742727	1	15422
2.02139e+06	823.294	2	52787
2.02139e+06	997878	5	47637
2.02139e+06	unbinned	140	1602747
2.05362e+06	745368	49	1980116
2.05362e+06	unbinned	29	377009
2.29298e+06	1.16072e+06	1	14121
2.29298e+06	1.26278e+06	1	4408
2.29298e+06	142586	1	6758
2.29298e+06	1.89698e+06	1	10017
2.29298e+06	1.8982e+06	2	47924
2.29298e+06	1.89821e+06	3	64117
2.29298e+06	39488.1	1	16359
2.29298e+06	745368	1	6465
2.29298e+06	unbinned	245	2020508
2.29303e+06	142586	1	6008
2.29303e+06	33043.1	1	6110
2.29303e+06	39488.1	1	13616
2.29303e+06	unbinned	255	1297072
239759	1.21181e+06	9	1827782
239759	unbinned	1	5677
239759	1.11806e+06	55	2657748
239759	1.21181e+06	6	812513
239759	1.26269e+06	79	2822355
239759	1.26304e+06	44	2739911
239759	1.87244e+06	78	1061039
239759	2.29291e+06	88	2208032
239759	626929	1	3229
239759	997878	1	2553
239759	unbinned	290	2318131
239935	239935	33	2738435
239935	unbinned	3	30861
301302	142586	3	95868
301302	1.8982e+06	9	478091
301302	39488.1	1	21420
301302	745368	1	23400
301302	unbinned	117	1995216
410073	1.26288e+06	2	13611
410073	142586	7	114528
410073	1.8982e+06	6	79986
410073	1.94642e+06	2	11992
410073	2.10969e+06	1	15306
410073	33043.1	4	62688
410073	39488.1	10	159484
410073	74426.1	2	11020
410073	unbinned	927	6132941
459786	1.89701e+06	20	1489311
459786	unbinned	8	99478
46503.2	1.11806e+06	6	32412
46503.2	1.21181e+06	1	2699
46503.2	1.26269e+06	6	55777
46503.2	1.26304e+06	1	53515
46503.2	1308.91	1	10390
46503.2	1.87244e+06	1	34794
46503.2	457393	145	1947210
46503.2	626929	205	4418676
46503.2	818.792	98	5015583
46503.2	823.294	29	326357
46503.2	997878	163	5139648
46503.2	997885	146	3828442
46503.2	unbinned	1409	12957388
487174	742727	22	2936899
487174	unbinned	2	92957
66666.6	1.11806e+06	1	9749
66666.6	1.16072e+06	1	43888
66666.6	1.26278e+06	1	11873
66666.6	1308.91	2	10614
66666.6	1506.36	1	31637
66666.6	1.89698e+06	1	26551
66666.6	1.89821e+06	1	24835
66666.6	1.89821e+06	1	4736
66666.6	unbinned	140	1991204
66666.6	1.26269e+06	1	5203
66666.6	1308.91	1	2599
66666.6	1.94642e+06	2	7054
66666.6	239935	1	8840
66666.6	74426.1	2	28120
66666.6	unbinned	373	1861703
66666.6	457393	16	151311
66666.6	unbinned	14	104755
66666.6	unbinned	45	364253
66666.6	997878	2	51811
66666.6	unbinned	18	173685
66666.6	1.11806e+06	4	24594
66666.6	1.16072e+06	3	44963
66666.6	1.26269e+06	1	11110
66666.6	1.26288e+06	5	161031
66666.6	1304.96	10	57160
66666.6	1308.91	33	215719
66666.6	142586	7	374462
66666.6	1506.36	19	1494441
66666.6	1.89698e+06	19	1447990
66666.6	1.89701e+06	1	6980
66666.6	1.8982e+06	13	498046
66666.6	1.89821e+06	4	45795
66666.6	1.89821e+06	1	4695
66666.6	1.94642e+06	1	9647
66666.6	1.95297e+06	1	6063
66666.6	2.10969e+06	11	242596
66666.6	33043.1	9	78245
66666.6	39488.1	149	1638978
66666.6	457393	1	15062
66666.6	626929	43	343447
66666.6	742727	1	93171
66666.6	74426.1	3	45584
66666.6	745368	1	6329
66666.6	818.792	5	191565
66666.6	823.294	5	77829
66666.6	997878	62	672547
66666.6	997885	13	253979
66666.6	unbinned	2711	16305794
66666.6	1308.91	1	7658
66666.6	1.89701e+06	3	53111
66666.6	1.89821e+06	2	32152
66666.6	1.95297e+06	1	26889
66666.6	626929	1	2695
66666.6	745368	2	41451
66666.6	823.294	1	8777
66666.6	unbinned	339	2480382
66666.6	745368	2	138016
66666.6	unbinned	33	308417
66666.6	1.11806e+06	2	82043
66666.6	1.26269e+06	1	14534
66666.6	unbinned	12	105748
66666.6	1.26278e+06	1	5880
66666.6	1.89701e+06	1	4477
66666.6	1.94651e+06	5	45958
66666.6	1.95297e+06	9	230602
66666.6	745368	13	145091
66666.6	unbinned	456	2581397
66666.6	1.89701e+06	1	3485
66666.6	1.89821e+06	85	1752381
66666.6	unbinned	148	1407473
66666.6	1.11806e+06	3	28356
66666.6	1.21181e+06	1	70580
66666.6	1.26269e+06	3	33901
66666.6	1.87244e+06	25	376370
66666.6	2.29291e+06	2	21049
66666.6	unbinned	55	594976
66666.6	1.11806e+06	1	5006
66666.6	1.26269e+06	1	6088
66666.6	unbinned	175	1072295
74426.2	74426.1	27	2029646
74426.2	unbinned	8	72916
79604.2	1.89821e+06	1	13888
79604.2	1.94651e+06	1	12391
79604.2	74426.1	7	128897
79604.2	unbinned	203	1231796
823.342	457393	1	3675
823.342	626929	2	17587
823.342	823.294	131	3194169
823.342	997878	1	2518
823.342	unbinned	93	1112185
872.4	1.21181e+06	4	77302
872.4	1.89821e+06	1	18152
872.4	1.94642e+06	2	15587
872.4	74426.1	1	25172
872.4	818.792	1	3891
872.4	unbinned	265	1940032
876091	1.26269e+06	1	14199
876091	1.26278e+06	2	18524
876091	1.89698e+06	1	4988
876091	1.89701e+06	1	8813
876091	1.89821e+06	1	33220
876091	1.95297e+06	2	28516
876091	626929	1	5894
876091	745368	1	3126
876091	unbinned	530	2994169
unused	1.11806e+06	105	202793
unused	1.16072e+06	5	15663
unused	1.21181e+06	3	2382
unused	1.26269e+06	115	124681
unused	1.26278e+06	5	32827
unused	1.26288e+06	1	1665
unused	1.26304e+06	9	83374
unused	1304.96	159	256333
unused	1308.91	378	401169
unused	142586	3	6728
unused	1506.36	4	5520
unused	1.87244e+06	23	49777
unused	1.89698e+06	2	2530
unused	1.89701e+06	5	8161
unused	1.8982e+06	5	7950
unused	1.89821e+06	6	82146
unused	1.89821e+06	18	83446
unused	1.94642e+06	16	47271
unused	1.94651e+06	23	43582
unused	1.95297e+06	9	13792
unused	2.10969e+06	3	3635
unused	2.29291e+06	18	55840
unused	239935	1	48575
unused	33043.1	28	3023726
unused	39488.1	34	73059
unused	457393	44	86068
unused	626929	195	298910
unused	74426.1	2	3392
unused	745368	10	12776
unused	818.792	8	30366
unused	823.294	19	75061
unused	997878	225	354029
unused	997885	7	23938

[truncated: 12 more sheets: ERR912124, SRR060006, SRR1950750, SRR1950766, SRR341647, SRR341697, SRR413750, SRR4305113, SRR4408221, SRR5091568, SRR5127609, SRR5279233]
